# Supplementary material for: Spatio-temporal dynamics of speleothem growth and glaciation in the British Isles
Source: Copernicus journal article supplement (doi:10.5194/cp-21-261-2025), 2025-01-29
Supplement: Supplementary file 1 [file cp-21-261-2025-supplement.pdf]

Supplement of *Clim. Past*, 21, 261–278, 2025  
<https://doi.org/10.5194/cp-21-261-2025-supplement>  
© Author(s) 2025. CC BY 4.0 License.

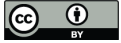

*Supplement of*

## **Spatio-temporal dynamics of speleothem growth and glaciation in the British Isles**

**Sina Panitz et al.**

*Correspondence to:* Sina Panitz ([sina.panitz@gmail.com](mailto:sina.panitz@gmail.com))

The copyright of individual parts of the supplement might differ from the article licence.

**Table S1. List of references used for compilation of dates.**

Channel Islands

Keen, D. H., Harmon, R. S., and Andrews, J. N.: U series and amino acid dates from Jersey, *Nature*, 289, 162–164, <https://doi.org/https://doi.org/10.1038/289162a0>, 1981.

England

Atkinson, T. C., Harmon, R. S., Smart, P. L., and Waltham, A. C.: Palaeoclimatic and geomorphic implications of  $^{230}\text{Th}/^{234}\text{U}$  dates on speleothems from Britain, *Nature*, 272, 24–28, <https://doi.org/10.1038/272024a0>, 1978.

Atkinson, T. C., Smart, P. L., and Andrews, J. N.: Uranium-series dating of speleothems from Mendip Caves. 1: Rhino Rift, Charterhouse-on-Mendip, *Proc. Univ. Bristol Speleol. Soc.*, 17, 55–69, 1984.

Atkinson, T. C., Lawson, T. J., Smart, P. L., Harmon, R. S., and Hess, J. W.: New data on speleothem deposition and palaeoclimate in Britain over the last forty thousand years, *J. Quat. Sci.*, 1, 67–72, <https://doi.org/10.1002/jqs.3390010108>, 1986.

Baker, A.: *Speleothem growth rate and palaeoclimate.*, University of Bristol, 232 pp., 1993.

Baker, A., Smart, P. L., and Lawrence Edwards, R.: Paleoclimate implications of mass spectrometric dating of a British flowstone, *Geology*, 23, 309, [https://doi.org/10.1130/0091-7613\(1995\)023<0309:PIOMSD>2.3.CO;2](https://doi.org/10.1130/0091-7613(1995)023<0309:PIOMSD>2.3.CO;2), 1995.

Baker, A., Smart, P. L., and Edwards, R. L.: Mass spectrometric dating of flowstones from Stump Cross Caverns and Lancaster Hole, Yorkshire: palaeoclimate implications, *J. Quat. Sci.*, 11, 107–114, [https://doi.org/10.1002/\(SICI\)1099-1417\(199603/04\)11:2<107::AID-JQS236>3.0.CO;2-E](https://doi.org/10.1002/(SICI)1099-1417(199603/04)11:2<107::AID-JQS236>3.0.CO;2-E), 1996.

Caseldine, C. J., McGarry, S. F., Baker, A., Hawkesworth, C., and Smart, P. L.: Late Quaternary speleothem pollen in the British Isles, *J. Quat. Sci.*, 23, 193–200, <https://doi.org/https://doi.org/10.1002/jqs.1121>, 2008.

Daley, T. J., Thomas, E. R., Holmes, J. A., Street-Perrott, F. A., Chapman, M. R., Tindall, J. C., Valdes, P. J., Loader, N. J., Marshall, J. D., Wolff, E. W., Hopley, P. J., Atkinson, T., Barber, K. E., Fisher, E. H., Robertson, I., Hughes, P. D. M., and Roberts, C. N.: The 8200yr BP cold event in stable isotope records from the North Atlantic region, *Glob. Planet. Change*, 79, 288–302, <https://doi.org/10.1016/j.gloplacha.2011.03.006>, 2011.

Farrant, A. R., Noble, S. R., Barron, A. J. M., Self, C. A., and Grebby, S. R.: Speleothem U-series constraints on scarp retreat rates and landscape evolution: an example from the Severn valley and Cotswold Hills gull-caves, UK, *J. Geol. Soc. London.*, 172, 63–76, <https://doi.org/10.1144/jgs2014-028>, 2015.

Ford, T. D.: The Evolution of the Castleton Cave Systems, Derbyshire, *Cave Karst Sci.*, 13, 131–148, 1986.

Ford, T. D., Gascoyne, M., and Beck, J. S.: Speleothem dates and Pleistocene Chronology in the Peak District of Derbyshire, *Cave Karst Sci.*, 10, 1983.

Gascoyne, M.: DOES THE PRESENCE OF STALAGMITES REALLY INDICATE WARM PERIODS? NEW EVIDENCE FROM YORKSHIRE AND CANADIAN CAVES, in: *PROCEEDINGS OF THE 7th INTERNATIONAL SPELEOLOGICAL CONGRESS SHEFFIELD, ENGLAND SEPTEMBER, 1977*, 208–210, 1977.

Gascoyne, M., Schwarcz, H. P., and Ford, D. C.: Uranium-series ages of speleothem from northwest England: correlation with Quaternary climate, *Philos. Trans. R. Soc. London. B, Biol. Sci.*, 301, 143–164, <https://doi.org/10.1098/rstb.1983.0024>, 1983.

Gilmour, M., Carrant, A., Jacobi, R., and Stringer, C.: Recent TIMS dating results from British Late Pleistocene vertebrate faunal localities: context and interpretation, *J. Quat. Sci.*, 22, 793–800, <https://doi.org/10.1002/jqs.1112>, 2007.

Gordon, D.: *The Pleistocene of the Mendip region : Aspects of the absolute dated, faunal and sediment records.*, University of Bristol, 370 pp., 1987.

Green, C. P., Coope, G. R., Carrant, A. P., Holyoak, D. T., Ivanovich, M., Jones, R. L., Keen, D. H., McGregor, D. F. M., and Robinson, J. E.: Evidence of two temperate episodes in late Pleistocene deposits at Marsworth, UK, *Nature*, 309, 778–781, <https://doi.org/10.1038/309778a0>, 1984.

Gunn, J., Fairchild, I., Moseley, G., Töchterle, P., Ashley, K. E., Hellstrom, J., and Edwards, R. L.: Palaeoenvironments in the central White Peak District ( Derbyshire , UK ): evidence from Water Icicle Close Cavern, *Cave Karst Sci.*, 47, 153–168, 2020.

Hodge, E., Hoffmann, D. L., Richards, D. A., and Smart, P. L.: Uranium-series ages for speleothem and tufa deposits associated with Quaternary mammalian fossil evidence in England and Wales, *Proc. Univ. Bristol Spelaeol. Soc.*, 27, 73–80, 2016.

Jacobi, R. M., Rowe, P. J., Gilmour, M. A., Grün, R., and Atkinson, T. C.: Radiometric dating of the Middle Palaeolithic tool industry and associated fauna of Pin Hole Cave, Creswell Crags, England, *J. Quat. Sci.*, 13, 29–42, [https://doi.org/10.1002/\(SICI\)1099-1417\(199801/02\)13:1<29::AID-JQS346>3.0.CO;2-6](https://doi.org/10.1002/(SICI)1099-1417(199801/02)13:1<29::AID-JQS346>3.0.CO;2-6), 1998.

Latham, A. P., Schwarcz, H. P., Ford, D. C., and Pearce, G. W.: Palaeomagnetism of stalagmite deposits, *Nature*, 280, 283–385, <https://doi.org/https://doi.org/10.1038/280383a0>, 1979.

Lundberg, J. and McFarlane, D. A.: Pleistocene depositional history in a periglacial terrane: A 500 k.y. record from Kents Cavern, Devon, United Kingdom, *Geosphere*, 3, 199, <https://doi.org/10.1130/GES00085.1>, 2007.

Lundberg, J., Simons, J., and McFarlane, D. A.: A Pleistocene chronology for the fauna and artefacts of Cow Cave, Devon, UK., *Cave Karst Sci.*, 34, 101–104, 2007.

Lundberg, J., Lord, T. C., and Murphy, P. J.: Thermal ionization mass spectrometer U-Th dates on Pleistocene speleothems from Victoria Cave, North Yorkshire, UK: Implications for paleoenvironment and stratigraphy over multiple glacial cycles, *Geosphere*, 6, 379–395, <https://doi.org/10.1130/GES00540.1>, 2010.

Lundberg, J., Lord, T. C., and Murphy, P. J.: New U-series dates from Stump Cross Caverns, Yorkshire, UK, and constraints on the age of the Banwell Bone Cave Mammal Assemblage Zone, *Proc. Geol. Assoc.*, 131, 639–651, <https://doi.org/10.1016/j.pgeola.2020.04.004>, 2020.

McFarlane, D. A., Lundberg, J., and Ford, D. C.: The Age of the Woolly Rhino from Dream Cave, Derbyshire, UK, *Cave Karst Sci.*, 27, 25–28, 2000.

McFarlane, D. A., Lundberg, J., and Cordingley, J.: A brief history of stalagmite growth measurements at Ingleborough Cave, Yorkshire, United Kingdom., *Cave Karst Sci.*, 31, 113–118, 2004.

McFarlane, D. A., Lundberg, J., and Neff, H.: A Speleothem Record of Early British and Roman Mining at Charterhouse, Mendip, England, *Archaeometry*, 56, 431–443, <https://doi.org/10.1111/arc.12025>, 2014.

Mullan, G. J. and Moody, A. A. D.: An account and survey of Great Oone’s Hole, Cheddar Gorge, Somerset, *Proc. Univ. Bristol Spelaeol. Soc.*, 26, 117–130, 2014.

Murphy, P. J. and Graham, N.: Uranium series dates from mass movement caves on the Isle of Portland, Dorset, UK, *Proc. Univ. Bristol Spelaeol. Soc.*, 25, 113–115, 2010.

Murphy, P. J. and Lowe, D. J.: A uranium-series date from a karst cave on the North York Moors, Yorkshire, UK, *Cave Karst Sci.*, 35, 105–106, 2008.

- Murphy, P. J. and Lundberg, J.: Uranium series dates from the windy pits of the North York Moors, United Kingdom: implications for late Quaternary ice cover and timing of speleogenesis, *Earth Surf. Process. Landforms*, 34, 305–313, <https://doi.org/10.1002/esp.1752>, 2009.
- Murphy, P. J. and Moseley, G. E.: A uranium-series date from Wall End Cave, Silverdale, northwest England: its palaeoclimatic and archaeological significance, *Cave Karst Sci.*, 47, 138–140, 2020.
- Murphy, P. J., Smallshire, R., and Midgley, C.: The sediments of Illusion Pot, Kingsdale, UK: Evidence for sub-glacial utilisation of a karst conduit in the Yorkshire Dales?, *Cave Karst Sci.*, 28, 29–34, 2001.
- Murphy, P. J., Lundberg, J., and Cordingley, J.: A uranium-series date from Keld Head Kingsdale, North Yorkshire, UK., *Cave Karst Sci.*, 31, 77–78, 2004.
- Murphy, P. J., Cordingley, J., and Waltham, T.: New uranium-series dates from Keld Head, Kingsdale, North Yorkshire, UK., *Cave Karst Sci.*, 35, 111–114, 2008.
- Murphy, P. J., Hodgson, D., Richards, D. A., and Standish, C. D.: Boreham Cave, Littondale, North Yorkshire, UK: some geomorphological observations., *Cave Karst Sci.*, 40, 109–113, 2013.
- Murphy, P. J., Moseley, G. E., Moseley, M., and Edwards, R. L.: Preliminary uranium-series ages and stable-isotopes from Fairy Hole, Warton Crag, Lancashire, UK: implications for speleogenesis and palaeoclimate, *Cave Karst Sci.*, 43, 103–106, 2016.
- Pike, A. W. G., Gilmour, M., Pettitt, P., Jacobi, R., Ripoll, S., Bahn, P., and Muñoz, F.: Verification of the age of the Palaeolithic cave art at Creswell Crags, UK, *J. Archaeol. Sci.*, 32, 1649–1655, <https://doi.org/10.1016/j.jas.2005.05.002>, 2005.
- Proctor, C. J.: A British Pleistocene chronology based on uranium series and electron spin resonance dating of speleothems., University of Bristol, 353 pp., 1994.
- Proctor, C. J. and Smart, P. L.: A dated cave sediment record of Pleistocene transgressions on Berry Head, Southwest England, *J. Quat. Sci.*, 6, 233–244, <https://doi.org/10.1002/jqs.3390060306>, 1991.
- Proctor, C. J., Berridge, P., Bishop, M., Richards, D. A., and Smart, P. L.: Age of Middle Pleistocene fauna and Lower Palaeolithic industries from Kent's Cavern, Devon, *Quat. Sci. Rev.*, 24, 1243–1252, <https://doi.org/10.1016/j.quascirev.2004.07.022>, 2005.
- Roberts, M. S., Smart, P. L., Hawkesworth, C. J., Perkins, W. T., and Pearce, N. J. G.: Trace element variations in coeval Holocene speleothems from GB Cave, southwest England, *The Holocene*, 9, 707–713, <https://doi.org/10.1191/095968399672615014>, 1999.
- Rowe, P. J.: Uranium-series dating of cave sites in the English Midlands, University of East Anglia, 1986.
- Rowe, P. J., Atkinson, T. C., and Jenkinson, R. D. S.: Uranium-Series Dating of Cave Deposits at Creswell Crags Gorge, England., *Cave Karst Sci.*, 16, 3–16, 1989.
- Simmonds, V.: Evidence for Pleistocene frost and ice damage of speleothems in Hallowe'en Rift, Mendip Hills, Somerset, UK, *Cave Karst Sci.*, 46, 74–78, 2019.
- Sutcliffe, A. J., Lord, T. C., Harmon, R. S., Ivanovich, M., Rae, A., and Hess, J. W.: Wolverine in Northern England at About 83,000 yr B.P.: Faunal Evidence for Climatic Change during Isotope Stage 5, *Quat. Res.*, 24, 73–86, [https://doi.org/10.1016/0033-5894\(85\)90084-5](https://doi.org/10.1016/0033-5894(85)90084-5), 1985.
- Waltham, T., Murphy, P., and Batty, A.: Kingsdale: the evolution of a Yorkshire dale, *Proc. Yorksh. Geol. Soc.*, 58, 95–105, <https://doi.org/10.1144/pygs.58.1.277>, 2010.

## Ireland

Fankhauser, A., McDermott, F., and Fleitmann, D.: Episodic speleothem deposition tracks the terrestrial impact of millennial-scale last glacial climate variability in SW Ireland, *Quat. Sci. Rev.*, 152, 104–117, <https://doi.org/10.1016/j.quascirev.2016.09.019>, 2016.

Gunn, J., Rushworth, G., Hunt, C., and Lauritzen, S.-E.: Clastic sediments in Crag Cave, in: Guidebook for KR6 field trip, 22nd June 2011, edited by: Gunn, J., 10–13, 2011.

Lundberg, J. and Drew, D.: The antiquity of Aillwee Cave calcite deposits, Burren District, Ireland., *Cave Karst Sci.*, 33, 9–10, 2006.

McDermott, F. and Fankhauser, A.: Episodic speleothem deposition in Ireland during the late Quaternary; implications for Greenland ice core chronology and British-Irish Ice Sheet dynamics, in: EGU General Assembly, 2016.

McDermott, F., Frisia, S., Huang, Y., Longinelli, A., Spiro, B., Heaton, T. H. E., Hawkesworth, C. J., Borsato, A., Keppens, E., Fairchild, I. J., Van der Borg, K., Verheyden, S., and Selmo, E.: Holocene climate variability in Europe: Evidence from  $\delta^{18}\text{O}$ , textural and extension-rate variations in three speleothems, *Quat. Sci. Rev.*, 18, 1021–1038, [https://doi.org/10.1016/S0277-3791\(98\)00107-3](https://doi.org/10.1016/S0277-3791(98)00107-3), 1999.

McDermott, F., Matthey, D. P., and Hawkesworth, C.: Centennial-Scale Holocene Climate Variability Revealed by a High-Resolution Speleothem  $\delta^{18}\text{O}$  Record from SW Ireland, *Science* (80-. ), 294, 1328–1331, <https://doi.org/10.1126/science.1063678>, 2001.

Simms, M. J.: Further insights into the Irish Quaternary from two other sites; Poulsallagh and Pol an Ionain, in: The Burren, Co. Clare. Irish Quaternary Association Field Guide no. 33., edited by: Nolan, J. and Randolph, C., Irish Quaternary Association, Dublin, 205–236, 2016.

Simms, M. J. and Coxon, P.: Glacial and karst landscapes of the Gort lowlands and Burren, *Quat. Cent. West. Irel. F. Guid.*, 39–63, 2005.

Swabey, S. E. J.: Rates of natural climate change: a study of speleothems, The Open University, <https://doi.org/https://doi.org/10.21954/ou.ro.0000d519>, 1996.

Vesely, M. M.: Annual Speleothem Laminae: Indicators of Paleoclimate in Ireland, Carleton University, 108 pp., 2000.

### Northern Ireland

Gunn, J.: Marble Arch Caves Global Geopark (MACGG) County Fermanagh, UK & County Cavan, Republic of Ireland, 13 pp., 2011.

### Scotland

Atkinson, T. C., Lawson, T. J., Smart, P. L., Harmon, R. S., and Hess, J. W.: New data on speleothem deposition and palaeoclimate in Britain over the last forty thousand years, *J. Quat. Sci.*, 1, 67–72, <https://doi.org/10.1002/jqs.3390010108>, 1986.

Baker, A., Smart, P. L., and Ford, D. C.: Northwest European palaeoclimate as indicated by growth frequency variations of secondary calcite deposits, *Palaeogeogr. Palaeoclimatol. Palaeoecol.*, 100, 291–301, [https://doi.org/10.1016/0031-0182\(93\)90059-R](https://doi.org/10.1016/0031-0182(93)90059-R), 1993.

Baker, A., Smart, P. L., Barnes, W. L., Edwards, R. L., and Farrant, A.: The Hekla 3 volcanic eruption recorded in a Scottish speleothem?, *The Holocene*, 5, 336–342, <https://doi.org/10.1177/095968369500500309>, 1995.

- Blyth, A. J., Baker, A., Thomas, L. E., and Van Calsteren, P.: A 2000-year lipid biomarker record preserved in a stalagmite from north-west Scotland, *J. Quat. Sci.*, 26, 326–334, <https://doi.org/10.1002/jqs.1457>, 2011.
- Farrant, A. R., Smith, C. J. M., Noble, S. R., Simmas, M. J., and Richards, D. A.: Speleogenetic evidence from Ogof Draenen for a pre-Devensian glaciation in the Brecon Beacons, South Wales, UK, *J. Quat. Sci.*, 29, 815–826, <https://doi.org/10.1002/jqs.2751>, 2014.
- Genty, D., Baker, A., Massault, M., Proctor, C., Gilmour, M., Pons-Branchu, E., and Hamelin, B.: Dead carbon in stalagmites: carbonate bedrock paleodissolution vs. ageing of soil organic matter. Implications for  $^{13}\text{C}$  variations in speleothems, *Geochim. Cosmochim. Acta*, 65, 3443–3457, [https://doi.org/10.1016/S0016-7037\(01\)00697-4](https://doi.org/10.1016/S0016-7037(01)00697-4), 2001.
- Gilmour, M., Curren, A., Jacobi, R., and Stringer, C.: Recent TIMS dating results from British Late Pleistocene vertebrate faunal localities: context and interpretation, *J. Quat. Sci.*, 22, 793–800, <https://doi.org/10.1002/jqs.1112>, 2007.
- Gray, J. M. and Ivanovich, M.: Age of the main rock platform, western Scotland, *Palaeogeogr. Palaeoclimatol. Palaeoecol.*, 68, 337–345, [https://doi.org/10.1016/0031-0182\(88\)90050-8](https://doi.org/10.1016/0031-0182(88)90050-8), 1988.
- Hodge, E., Hoffmann, D. L., Richards, D. A., and Smart, P. L.: Uranium-series ages for speleothem and tufa deposits associated with Quaternary mammalian fossil evidence in England and Wales, *Proc. Univ. Bristol Spelaeol. Soc.*, 27, 73–80, 2016.
- Lawson, T. J. and Atkinson, T. C.: Quaternary Chronology, in: *The Quaternary of Assynt and Coigach: field guide*, edited by: Lawson, T. J., Quaternary Research Association, 12–18, 1995.
- Nash, G. H., van Calsteren, P., Thomas, L., and Simms, M. J.: A discovery of possible Upper Palaeolithic parietal art in Cathole Cave, Gower peninsula, South Wales, *Proc. Univ. Bristol Spelaeol. Soc.*, 25, 327–336, 2012.
- Proctor, C. J.: *A British Pleistocene chronology based on uranium series and electron spin resonance dating of speleothem.*, University of Bristol, 353 pp., 1994.
- Proctor, C. J., Baker, A., Barnes, W. L., and Gilmour, M. A.: A thousand year speleothem proxy record of North Atlantic climate from Scotland, *Clim. Dyn.*, 16, 815–820, <https://doi.org/10.1007/s003820000077>, 2000.
- Sissons, J. B.: The So-Called High “Interglacial” Rock Shoreline of Western Scotland, *Trans. Inst. Br. Geogr.*, 7, 205, <https://doi.org/10.2307/622222>, 1982.
- Stringer, C. B., Curren, A. P., Schwarcz, H. P., and Collcutt, S. N.: Age of Pleistocene faunas from Bacon Hole, Wales, *Nature*, 320, 59–62, <https://doi.org/10.1038/320059a0>, 1986.

### Wales

- Debenham, N. C., Aitken, M. J., Walton, A. J., and Winter, M.: Thermoluminescence and uranium series dating of stalagmitic calcite, in: *Studies of Pontnewydd Cave, Wales*, edited by: Green, H. S., National Museum of Wales, Cardiff, 100–105, 1984.
- Farrant, A. R., Smith, C. J. M., Noble, S. R., Simmas, M. J., and Richards, D. A.: Speleogenetic evidence from Ogof Draenen for a pre-Devensian glaciation in the Brecon Beacons, South Wales, UK, *J. Quat. Sci.*, 29, 815–826, <https://doi.org/10.1002/jqs.2751>, 2014.
- Gordon, D.: *The Pleistocene of the Mendip region : Aspects of the absolute dated, faunal and sediment records.*, University of Bristol, 370 pp., 1987.

Hodge, E., Hoffmann, D. L., Richards, D. A., and Smart, P. L.: Uranium-series ages for speleothem and tufa deposits associated with Quaternary mammalian fossil evidence in England and Wales, *Proc. Univ. Bristol Spelaeol. Soc.*, 27, 73–80, 2016.

Ivanovich, M., Rae, A. M. B., and Wilkins, M. A.: Brief report on dating the in situ stalagmitic floor found in the East Passage in 1982, in: *Studies of Pontnewydd Cave, Wales*, edited by: Green, H. S., National Museum of Wales, Cardiff, 98–99, 1984.

Nash, G. H., van Calsteren, P., Thomas, L., and Simms, M. J.: A discovery of possible Upper Palaeolithic parietal art in Cathole Cave, Gower peninsula, South Wales, *Proc. Univ. Bristol Spelaeol. Soc.*, 25, 327–336, 2012.

Proctor, C. J.: *A British Pleistocene chronology based on uranium series and electron spin resonance dating of speleothem.*, University of Bristol, 353 pp., 1994.

Schwarcz, H. P.: Uranium-series dating and stable isotope analyses of calcite deposits, in: *Studies of Pontnewydd Cave, Wales*, edited by: Green, H. S., National Museum of Wales, Cardiff, 88–97, 1984.

Stringer, C. B., Carrant, A. P., Schwarcz, H. P., and Collcutt, S. N.: Age of Pleistocene faunas from Bacon Hole, Wales, *Nature*, 320, 59–62, <https://doi.org/10.1038/320059a0>, 1986.
